# Supplementary material for: Reversibly switchable methanofullerene by photoexcitation and reduction
Source: Royal Society of Chemistry journal article supplement (doi:10.1039/d2cp03945a), 2022-01-01
Supplement: d2cp03945a1.pdf [file d2cp03945a1.pdf]

Supporting Information for

# Methanofullerene reversibly switchable by photoexcitation and reduction

Sofia V. Gracheva, Tatiana S. Yankova, Maria P. Kosaya, Victor A. Brotsman, Ilya N. Ioffe,  
Natalia S. Lukonina\*, Alexey A. Goryunkov

Contents:

|                                     |   |
|-------------------------------------|---|
| Reagents and solvents.....          | 1 |
| Synthetic procedures .....          | 1 |
| Experimental methods .....          | 2 |
| Quantum chemical calculations ..... | 3 |
| References:.....                    | 3 |

## Reagents and solvents

4,4'-dimethoxybenzophenone (Sigma-Aldrich, 97%), tosyl hydrazine (TsNHNH<sub>2</sub>) (Sigma-Aldrich, 97%), TsOH·H<sub>2</sub>O (Sigma-Aldrich, 98.5%), C<sub>70</sub> (Fullerene-center, Russia, 99.8%), CF<sub>3</sub>I (P&M Invest, Russia, 99%), pyridine (Acros Organics, 99+%), 18-crown-6 (Sigma-Aldrich, 99%) were used as received. K<sub>2</sub>CO<sub>3</sub> was dried in vacuo at 120°C for 3 hours.

Toluene (Chimmed, 99%) was refluxed over Na for 2 h, and then distilled; fraction with b.p. 110.6 °C was collected. Hexane (Chimmed, 99%) was refluxed over P<sub>2</sub>O<sub>5</sub> for 2 h, and then distilled; fraction with b.p. 69°C was collected.

*o*-Dichlorobenzene (Acros Organics, 99%) was refluxed over CaH<sub>2</sub> for 2 h, and then distilled under reduced pressure (12 mmHg); fraction with b.p. 64°C was collected.

## Synthetic procedures

**Synthesis of 4,4'-dimethoxybenzophenone tosyl hydrazone**<sup>1</sup>. 4,4'-dimethoxybenzophenone (2.12 g, 8.7 mmol) was dissolved in methanol in a round bottom flask, then TsNHNH<sub>2</sub> (1.64 g, 8.8 mmol) and TsOH·H<sub>2</sub>O (catalytic amount) was added. The reaction mixture was refluxed for 6 hours. After that, the reaction mixture was cooled down, the white precipitate was vacuum-filtrated and washed with cold methanol (3.30 g, 8.0 mmol, 91% yield).

**Synthesis of C<sub>5</sub>-C<sub>70</sub>(CF<sub>3</sub>)<sub>8</sub>**<sup>2</sup>. To obtain C<sub>5</sub>-C<sub>70</sub>(CF<sub>3</sub>)<sub>8</sub>, a two-step procedure was employed. Fullerene C<sub>70</sub> (40 mg) was placed into a three-section glass ampoule, and the excess of CF<sub>3</sub>I was condensed. The ampoule was sealed and heated at 420 °C in a gradient furnace for 48 h to give a mixture of higher

trifluoromethylfullerenes (146 mg), which was then thoroughly ground with pristine  $C_{70}$  (56 mg), put into two-section glass ampoule. Then the ampoule was sealed and heated at 440 °C in a gradient furnace for 40 h. Individual trifluoromethylfullerenes were isolated by means of preparative HPLC.

Mixture of  $C_{70}(CF_3)_n$  ( $n=18-20$ ): MALDI MS  $m/z$  (I, %): 2082 (7%,  $C_{70}(CF_3)_{18}^-$ ), 2152 (25%,  $C_{70}(CF_3)_{19}^-$ ), 2220 (100%,  $C_{70}(CF_3)_{20}^-$ ).

Mixture of  $C_{70}(CF_3)_n$  ( $n=6-10$ ): MALDI MS  $m/z$  (I, %): 840 (25%,  $C_{70}^-$ ), 1254 (11%,  $C_{70}(CF_3)_6^-$ ), 1392 (100%,  $C_{70}(CF_3)_8^-$ ), 1530 (90%,  $C_{70}(CF_3)_{10}^-$ ); HPLC ( $t_R$ , min, CB 4.6 mm i.d. × 250 mm, toluene, 1 mL·min<sup>-1</sup>): 3.7 ( $C_1$ - $p^7mp$ - $C_{70}(CF_3)_{10}$ ), 4.6 ( $C_5$ - $p^7$ - $C_{70}(CF_3)_8$ ), 5.2 ( $C_2$ - $C_{70}(CF_3)_8$ ), 12.5 ( $C_{70}$ ).

$C_5$ - $p^7$ - $C_{70}(CF_3)_8$ : MALDI MS  $m/z$  (I, %): 1392 ( $M^-$ ,  $C_{70}(CF_3)_8^-$ ), 100%; HPLC ( $t_R$ , min, CB 4.6 mm i.d. × 250 mm, toluene 1 mL·min<sup>-1</sup>): 4.6.

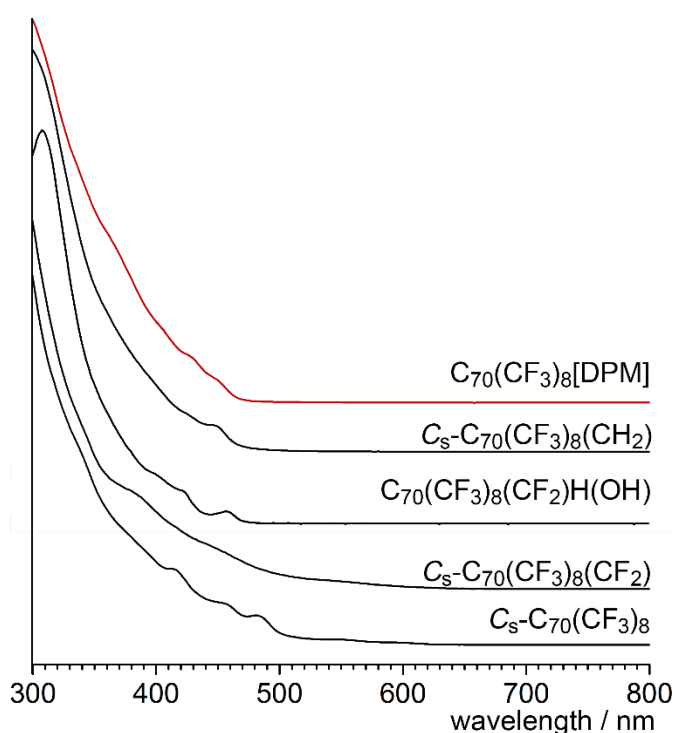

**Figure S1.** UV-vis spectrum of  $C_{70}(CF_3)_8$ [DPM] in comparison with parent  $C_{70}(CF_3)_8$  and other related derivatives.

## Experimental methods

**Mass spectrometry.** MALDI mass spectra were recorded in the negative ions mode using a Bruker Autoflex II TOF-mass spectrometer (337 nm impulse nitrogen laser). Trans-2-[3-(4-tert-Butylphenyl)-2-methyl-2-propenyldene]malononitrile (DCTB, Sigma Aldrich, ≥98%) was used as matrix.

## Quantum chemical calculations

Vertical emission energy and excited state geometry optimization were computed by TDDFT approach with employment BHHLYP<sup>3</sup> and PBE0<sup>4</sup> hybrid functionals using Def2-SVP basis set<sup>5</sup> and the Firefly v. 8.2.0 package<sup>6</sup>, partly based on the GAMESS(US) software code<sup>7</sup>.

Molecular geometry optimization and relaxed PES scan were calculated at the DFT level of the theory using of the PRIRODA v.6 software implementing efficient RI approximation<sup>8</sup>, PBE exchange-correlation functional<sup>9</sup> and a built-in basis set of triple zeta quality (TZ2p). Isotropic hyperfine coupling constants were calculated at the DFT-PBE level with quadruple zeta quality basis (QZ3p).

a) open configuration

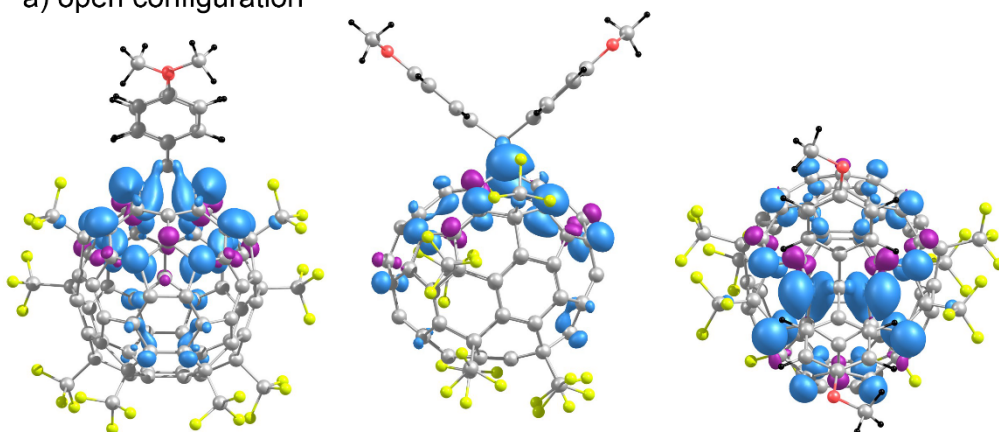

b) closed configuration

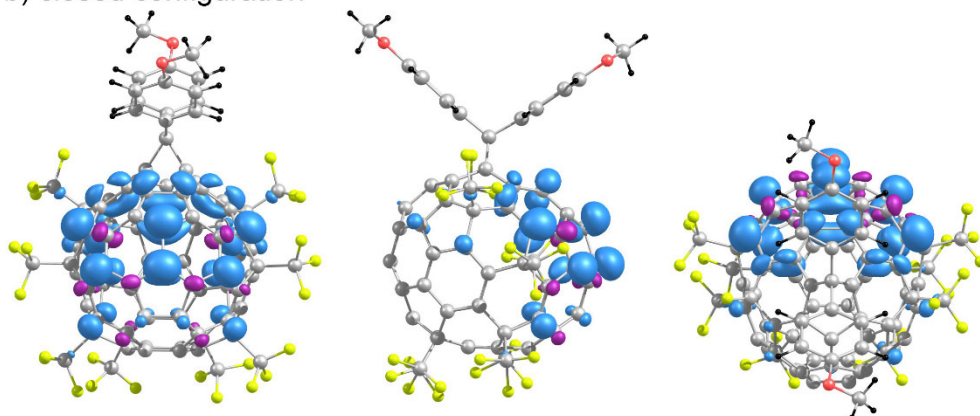

**Figure S2.** Spin density distribution in the (a) open and (b) closed configurations of  $C_{70}(CF_3)_8[DPM]^{•-}$ .

## References:

- 1 Y. Xia, F. Hu, Z. Liu, P. Qu, R. Ge, C. Ma, Y. Zhang and J. Wang, Palladium-Catalyzed Diarylmethyl C(sp<sup>3</sup>)-C(sp<sup>2</sup>) Bond Formation: A New Coupling Approach toward Triarylmethanes, *Org. Lett.*, 2013, **15**, 1784–1787.
- 2 N. M. Belov, M. G. Apenova, A. V. Rybalchenko, E. V. Borkovskaya, N. S. Lukonina, A. A. Goryunkov, I. N. Ioffe, S. I. Troyanov and L. N. Sidorov, Transalkylation of higher trifluoromethylated fullerenes with C70: a pathway to new addition patterns of C70(CF3)<sub>8</sub>, *Chem. Eur. J.*, 2014, **20**, 1126–1133.
- 3 A. D. Becke, A new mixing of Hartree–Fock and local density-functional theories, *The Journal of Chemical Physics*, 1993, **98**, 1372–1377.

- 4 C. Adamo and V. Barone, Toward reliable density functional methods without adjustable parameters: The PBE0 model, *The Journal of Chemical Physics*, 1999, **110**, 6158–6170.
- 5 F. Weigend and R. Ahlrichs, Balanced basis sets of split valence, triple zeta valence and quadruple zeta valence quality for H to Rn: Design and assessment of accuracy, *Phys Chem Chem Phys*, 2005, **7**, 3297–3305.
- 6 A. A. Granovsky, 2016.
- 7 M. W. Schmidt, K. K. Baldridge, J. A. Boatz, S. T. Elbert, M. S. Gordon, J. H. Jensen, S. Koseki, N. Matsunaga, K. A. Nguyen, S. Su, T. L. Windus, M. Dupuis and J. A. Montgomery, General atomic and molecular electronic structure system, *Journal of Computational Chemistry*, 1993, **14**, 1347–1363.
- 8 D. N. Laikov, Fast evaluation of density functional exchange-correlation terms using the expansion of the electron density in auxiliary basis sets, *Chem. Phys. Lett.*, 1997, **281**, 151–156.
- 9 J. P. Perdew, K. Burke and M. Ernzerhof, Generalized Gradient Approximation Made Simple, *Phys. Rev. Lett.*, 1996, **77**, 3865–3868.
